# Supplementary material
Source: PubMed Central journal article supplement (PMC7523658)
Supplement: MCB.00221-20-s0001.pdf [file MCB.00221-20-s0001.pdf]

1

## 2 Supplementary Table: oligonucleotide sequences

| Primers for q-RTPCR                   | sequence                        |
|---------------------------------------|---------------------------------|
| QhAgo2-F                              | 5'-GGGTTGGGAAAAGTGGAAAC-3'      |
| QhAgo2-R                              | 5'-GTGACACAGCTGGTAGGTAG-3'      |
| QDICER1-F                             | 5'-TGGAGACGCCAATAGCAATA-3'      |
| QDICER1-R                             | 5'-TGCTGCTGCAGTGAATTCTT-3'      |
| QRluc-F                               | 5'-CGTGCAAGTGATGATTTACC-3'      |
| QRluc-R                               | 5'-TCTTGCGAAAAATGAAGACC-3'      |
| Qbetaactin-F                          | 5'-CATCGAGCACGGCATCGTCA-3'      |
| Qbetaactin-R                          | 5'-TAGCACAGCCTGGATAGCAAC-3'     |
| TFRC-F                                | 5'-CGCTGGTCAGTTCGTGATTA-3'      |
| TFRC-R                                | 5'-AACTCAGGCCCATTTCCCTT-3'      |
| U6-F                                  | 5'-CTCGCTTCGGCAGCACACA-3'       |
| U6-R                                  | 5'-AACGCTTCACGAATTTGCGT-3'      |
| pre-let7a-F                           | 5'-AGGTAGTAGGTTGTATAGTTTTAGG-3' |
| pre-let7a-R                           | 5'-TAGGAAAGACAGTAGATTGTATAGT-3' |
| pre-mir30a-F                          | 5'-GTAAACATCCTCGACTGGAAGCT-3'   |
| pre-mir30a-R                          | 5'-GCTGCAAACATCCGACTGAA-3'      |
| pre-mir27ab-F                         | 5'-GCAGGGCTTAGCTGCTTG-3'        |
| pre-mir27ab-R                         | 5'-GGCGGAAGCTTAGCCACTGT-3'      |
| pre-mir99b-F                          | 5'-CCCACCCGTAGAACCGAC-3'        |
| pre-mir99b-R                          | 5'-CCACAGACACGAGCTTGTGT-3'      |
| pre-mir21-F                           | 5'-GCTTATCAGACTGATGTTGACTG-3'   |
| pre-mir21-R                           | 5'-CAGCCCATCGACTGGTG-3'         |
| pre-mir10ab-F                         | 5'-TACCCTGTAGATCCGAATTTGTG-3'   |
| pre-mir10ab-R                         | 5'-ATTCCCCTAGATACGAATTTGTGA-3'  |
| pre-mir100-F                          | 5'-AACCCGTAGATCCGAAGCTTG-3'     |
| pre-mir100-R                          | 5'-TACCTATAGATACAAGCTTGTGCG-3'  |
| pre-mir191-F                          | 5'-GCAACGGAATCCCAAAG-3'         |
| pre-mir191-R                          | 5'-GACGAAATCCAAGCGCA-3'         |
| miRNA sponges                         | sequence                        |
| pAS7w.mCherry-CMV<br>d2EGFP-CXCR4-13x | 5'-AAGTTTTTCAGAAAGCTAACA-3'     |
| pAS7w.mCherry-CMV<br>d2EGFP-let7a-13x | 5'-AACTATACAAGGACTACCTCA-3'     |
| pAS7w.mCherry-CMV                     | 5'-AACCACACAAGGACTACCTCA-3'     |

|                                            |                                         |
|--------------------------------------------|-----------------------------------------|
| d2EGFP-let7b-13x                           |                                         |
| pAS7w.mCherry-CMV<br>d2EGFP-miR103a-3p-13x | 5'-TCATAGCCCTGCTTATGCTGCT-3'            |
| CRISPR/CAS                                 | sequence                                |
| sgAgo2 (1)                                 | 5'-GCCGGCTCCCGAGTACATGG-3'              |
| sgAgo2 (2)                                 | 5'-GCGCCGCCGCCCCCATCCA-3'               |
| sgDICER1 (1)                               | 5'-TCACCAATGGGTCCTTTCTT-3'              |
| sgDICER1 (2)                               | 5'-CTGACACTTGTTGAGCAACC-3'              |
| siRNA                                      | sequence                                |
| si-Ago2 smart pool                         | Mixture of the following four sequences |
| D-004639-01                                | 5'-GCACGGAAGUCCAUCUGAA-3'               |
| D-004639-02                                | 5'-GCAGGACAAAGAUGUAUUA-3'               |
| D-004639-03                                | 5'-GGGUCUGUGGUGAUAAAUA-3'               |
| D-004639-04                                | 5'-GUAUGAGAACCCAAUGUCA-3'               |
| Let-7a miRNA                               |                                         |
| hsa-Let-7a                                 | sequence                                |
|                                            | 5'-UGAGGUAGUAGGUUGUAUAGUU-3'            |

3

4
